# Supplementary material
Source: PubMed Central journal article supplement (PMC4452415)
Supplement: NIHMS680910-supplement-1.pdf [file NIHMS680910-supplement-1.pdf]

## Video Legends

Video 1: FSM Analysis of Spindles. FSM of spindles containing 6 nM GFP-XCTK2 (top left), 6 nM GFP-XCTK NLS2b2 (top right), or 20 nM GFP-XCTK2 (122-643) (bottom left) and 20  $\mu$ M rhodamine-labeled tubulin. Images were collected in each channel every 2 s for 2.5 min total. Corresponds to Figure 3.

Video 2: FRAP Analysis of GFP-XCTK2 or GFP-XCTK2-NLS2b. Photobleaching and recovery analysis of spindles containing 100 nM GFP-XCTK2 (top) or 50 nM GFP-XCTK2-NLS2b (bottom) and 0.5  $\mu$ M X-rhodamine tubulin. Imaging at 0.7 s intervals for 70 s total. Corresponds to Figure 4.
